# Supplementary material for: Broad-Spectrum Antiviral Activity of an Ankyrin Repeat Protein on Viral Assembly against Chimeric NL4-3 Viruses Carrying Gag/PR Derived from Circulating Strains among Northern Thai Patients
Source: PubMed Central journal article supplement (PMC6265948; doi:10.3390/v10110625), 2018-11-13
Supplement: viruses-10-00625-s001.pdf [file viruses-10-00625-s001.pdf]

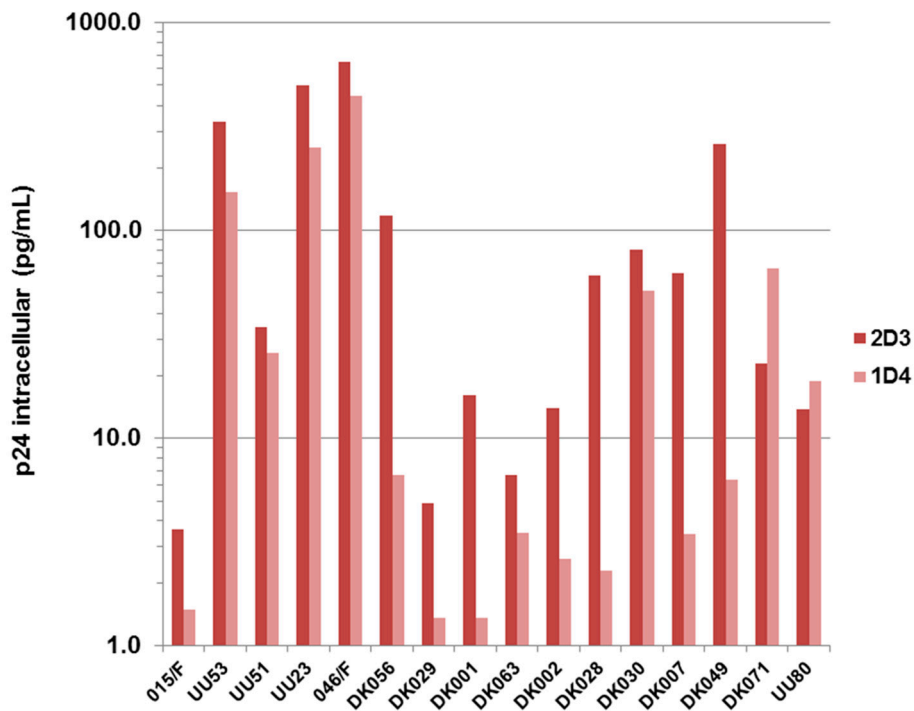

**Figure S1.** The intracellular levels of p24CA in SupT1/Ank<sup>GAG</sup>1D4, and SupT1/Ank<sup>A32</sup>D3 cells on day 7 post-infection. The SupT1/Ank<sup>GAG</sup>1D4 and SupT1/Ank<sup>A32</sup>D3 cells were collected on day 7 post-infection for this purpose. The representative 14 samples in each cluster (C1, C2, C3, and C4) and two samples (DK071 and UU80), for which Ank<sup>GAG</sup>1D4 did not show the inhibition effect, were selected. Cellular proteins were extracted by RIPA buffer. The total protein lysates were normalised to 10 µg/mL to determine the intracellular levels of p24CA using Genscreen ULTRA HIV Ag-Ab Assay.
